# Supplementary material
Source: HighWire-hosted journal article supplement (https://bmjopen.bmj.com/content/11/8/e049083)
Supplement: inline-supplementary-material-1 [file inline-supplementary-material-1.pdf]

**Appendix****Table 1** Samples for bio bank

| <b>Sample</b>            | <b>Histopathology</b> | <b>-80°C storage</b> | <b>Chemical analysis</b> | <b>Bacteriological analysis</b> | <b>Virological analysis</b> |
|--------------------------|-----------------------|----------------------|--------------------------|---------------------------------|-----------------------------|
| Spinal cord              | +                     |                      |                          |                                 |                             |
| Olfactory bulb           | +                     | +                    |                          |                                 |                             |
| Orbital frontal cortex   | +                     | +                    | +                        | +                               | +                           |
| Insula                   | +                     | +                    |                          |                                 |                             |
| Thalamus                 | +                     | +                    |                          |                                 |                             |
| Pons                     | +                     | +                    |                          |                                 |                             |
| Cerebellum               | +                     | +                    |                          |                                 |                             |
| Medial occipital cortex  | +                     | +                    |                          |                                 |                             |
| Medulla oblongata        | +                     |                      |                          |                                 |                             |
| Hippocampus              | +                     |                      |                          |                                 |                             |
| Olfactory epithelium     | +                     |                      |                          |                                 |                             |
| Peroneal nerve           | +                     | +                    |                          |                                 |                             |
| Tibialis anterior muscle | +                     | +                    |                          |                                 |                             |
| Conjunctivae             | +                     |                      |                          |                                 |                             |
| Tonsil                   | +                     | +                    |                          |                                 | +                           |
| Soft palate              | +                     | +                    |                          |                                 |                             |
| Uvula                    | +                     | +                    |                          |                                 |                             |
| Sublingual gland         | +                     | +                    |                          |                                 |                             |
| Tongue anteriorly        | +                     | +                    |                          |                                 |                             |
| Tongue posteriorly       | +                     | +                    |                          |                                 |                             |
| Lung, upper lobe pleural | +                     | +                    |                          | +                               | +                           |
| Lung, upper lobe central | +                     | +                    |                          |                                 |                             |
| Lung, lower lobe pleural | +                     | +                    |                          | +                               | +                           |
| Lung, lower lobe central | +                     | +                    |                          |                                 |                             |
| Heart, LV anteriorly     | +                     | +                    |                          |                                 |                             |
| Heart, LV laterally      | +                     |                      |                          |                                 |                             |
| Heart, LV posteriorly    | +                     | +                    |                          |                                 |                             |
| Heart, RV anteriorly     | +                     | +                    |                          |                                 |                             |
| Heart, RV laterally      | +                     |                      |                          |                                 |                             |
| Heart, RV posteriorly    | +                     | +                    |                          |                                 |                             |
| Heart septum             | +                     | +                    |                          | +                               | +                           |
| Heart papillary muscle   | +                     |                      |                          |                                 |                             |
| Heart valves             |                       |                      |                          | +                               |                             |
| Aorta arch               | +                     | +                    |                          |                                 |                             |
| Aorta thoracic           | +                     | +                    |                          |                                 |                             |
| Aorta abdominal          | +                     | +                    |                          |                                 |                             |
| Oesophagus               | +                     | +                    |                          |                                 |                             |
| Stomach                  | +                     | +                    |                          |                                 |                             |
| Duodenum                 | +                     | +                    |                          |                                 |                             |
| Jejunum                  | +                     | +                    |                          | +                               | +                           |

|                    |   |   |   |   |   |
|--------------------|---|---|---|---|---|
| Ascending colon    | + | + |   |   |   |
| Descending colon   | + | + |   |   |   |
| Liver              | + | + | + |   |   |
| Spleen             | + | + |   |   |   |
| Pancreas           | + |   |   |   |   |
| Adrenal gland*     | + |   |   |   |   |
| Kidneys            | + | + |   | + | + |
| Lymph node         | + | + |   |   |   |
| Bone marrow        | + |   |   |   |   |
| Thyroid gland*     | + |   |   |   |   |
| Pituitary gland    | + |   |   |   |   |
| Testis/ovary*      | + |   |   |   |   |
| Prostate/uterus*   | + |   |   |   |   |
| Spinal fluid       |   |   |   |   | + |
| Vitreous liquid    |   |   | + |   |   |
| Pharyngeal swab    |   |   |   | + | + |
| Stomach contents   |   |   | + |   |   |
| Urine/bladder wall |   |   | + |   | + |
| Pleural liquid     |   | + |   |   |   |
| Pericardial liquid |   | + |   |   |   |
| Heart blood        |   | + |   |   |   |
| Heart blood serum  |   |   |   |   |   |
| Peripheral blood   |   |   | + | + | + |

\* Only police-requested autopsies. LV, left ventricular; RV, right ventricular.

‘+’ means sample taken. ‘Blank’ means no sample taken. Chemical and virological analyses are performed on all cases. Histopathology and bacteriological samples are stored for later analysis. –80°C samples are stored for later analysis.
